# Supplementary material for: A school-based nutrition education program involving children and their guardians in Japan: facilitation of guardian-child communication and reduction of nutrition knowledge disparity
Source: PubMed Central journal article supplement (PMC8600693; doi:10.1186/s12937-021-00751-z), 2021-11-18
Supplement: 12937_2021_751_MOESM1_ESM.pdf [file 12937_2021_751_MOESM1_ESM.pdf]

Supplementary Table 1. Food intakes and their change from May to October among children (n=1998) and guardians (n=1300)<sup>a</sup>

|          |                                                      | First group (intervention group in October) <sup>b</sup> |         |                                            |       | Second group (control group in October) <sup>b</sup> |         |                                            |       | p value <sup>e</sup><br>(Comparison<br>b/w X and Y) |
|----------|------------------------------------------------------|----------------------------------------------------------|---------|--------------------------------------------|-------|------------------------------------------------------|---------|--------------------------------------------|-------|-----------------------------------------------------|
|          |                                                      | Survey timing                                            |         | Change b/w Oct<br>and May <sup>d</sup> (X) |       | Survey timing                                        |         | Change b/w Oct<br>and May <sup>d</sup> (Y) |       |                                                     |
|          |                                                      | May                                                      | October | February                                   |       | May                                                  | October | February                                   |       |                                                     |
| Child    | Number of respondents                                | 978                                                      | 978     | 978                                        |       | 1020                                                 | 1020    | 1020                                       |       |                                                     |
|          | Nutrition knowledge (%)                              | 70.9                                                     | 80.8    | 79.4                                       | 9.9   | 69.1                                                 | 70.5    | 78.3                                       | 1.3   | <0.001                                              |
|          | Food intake (adjusted mean, g/1000kcal) <sup>c</sup> |                                                          |         |                                            |       |                                                      |         |                                            |       |                                                     |
|          | Staple food <sup>e</sup>                             | 223                                                      | 237     | 244                                        | 13.3  | 225                                                  | 234     | 243                                        | 9.1   | 0.18                                                |
|          | Soybeans and soy products                            | 22                                                       | 21      | 23                                         | -1.0  | 21                                                   | 21      | 23                                         | -0.04 | 0.74                                                |
|          | Vegetables <sup>f</sup>                              | 99                                                       | 96      | 110                                        | -2.8  | 87                                                   | 87      | 96                                         | 0.1   | 0.15                                                |
|          | Fruits                                               | 29                                                       | 29      | 36                                         | 0.5   | 24                                                   | 25      | 33                                         | 1.7   | 0.25                                                |
|          | Fish                                                 | 28                                                       | 28      | 28                                         | 0.3   | 29                                                   | 29      | 28                                         | -0.04 | 0.92                                                |
|          | Meat                                                 | 37                                                       | 36      | 35                                         | -0.5  | 36                                                   | 36      | 35                                         | 0.001 | 0.77                                                |
|          | Milk and dairy products                              | 114                                                      | 115     | 108                                        | 1.3   | 111                                                  | 112     | 110                                        | 1.1   | 0.85                                                |
|          | Sweets and snacks                                    | 47                                                       | 45      | 39                                         | -1.6  | 49                                                   | 47      | 40                                         | -2.3  | 0.67                                                |
|          | Soft drinks <sup>g</sup>                             | 64                                                       | 61      | 54                                         | -3.3  | 70                                                   | 68      | 63                                         | -2.1  | 0.30                                                |
| Guardian | Number of respondents                                | 636                                                      | 636     | 636                                        |       | 664                                                  | 664     | 664                                        |       |                                                     |
|          | Nutrition knowledge (%)                              | 71.3                                                     | 73.0    | 74.4                                       | 2.6   | 69.1                                                 | 70.1    | 71.8                                       | 1.8   | <0.001                                              |
|          | Food intake (adjusted mean, g/1000kcal) <sup>c</sup> |                                                          |         |                                            |       |                                                      |         |                                            |       |                                                     |
|          | Staple food <sup>f</sup>                             | 224                                                      | 224     | 228                                        | -0.03 | 235                                                  | 225     | 232                                        | -10.2 | 0.07                                                |
|          | Soybeans and soy products                            | 34                                                       | 33      | 35                                         | -1.1  | 30                                                   | 32      | 34                                         | 1.1   | 0.56                                                |
|          | Vegetables <sup>g</sup>                              | 130                                                      | 126     | 134                                        | -4.8  | 117                                                  | 112     | 124                                        | -5.6  | 0.03                                                |
|          | Fruits                                               | 26                                                       | 29      | 32                                         | 3.2   | 21                                                   | 24      | 30                                         | 2.8   | 0.054                                               |
|          | Fish                                                 | 36                                                       | 39      | 38                                         | 3.2   | 33                                                   | 38      | 37                                         | 5.4   | 0.35                                                |
|          | Meat                                                 | 45                                                       | 45      | 46                                         | -0.2  | 44                                                   | 45      | 45                                         | 1.2   | 0.29                                                |
|          | Milk and dairy products                              | 56                                                       | 57      | 62                                         | 1.1   | 52                                                   | 56      | 59                                         | 4.2   | 0.60                                                |
|          | Sweets and snacks                                    | 38                                                       | 34      | 32                                         | -3.5  | 38                                                   | 35      | 33                                         | -3.0  | 0.61                                                |
|          | Soft drinks <sup>h</sup>                             | 27                                                       | 27      | 17                                         | -0.1  | 31                                                   | 33      | 21                                         | 2.4   | 0.03                                                |

b/w, between; Oct, October

<sup>a</sup> Participants included in Table 1 having sufficient information about food intakes and characteristics the in three surveys (May, October, and February) were included in the analysis.

<sup>b</sup> Nutrition education was given between June and September for the First group and between October and January for the Second group.

Thus, in October, the First group was an intervention group (after the intervention) and the Second group was a control group (before the intervention).

<sup>c</sup> Food intakes adjusted for sex and grade/age by analysis of covariance are shown.

<sup>d</sup> Differences were calculated as follows: food intakes in October - those in May. Those adjusted for sex and grade/age by analysis of covariance are shown.

<sup>e</sup> Comparison of changes between the First group and the Second group are shown. The p values for food intakes were calculated by a mixed model which included the change in a food intake (g/1000kcal) as a dependent variable and implementation of nutrition education as an independent variable.

Survey area was included as a random effect in the model, and sex, grade (children)/age(guardians), and corresponding food intake at baseline (children or guardians) were included as fixed effects.

<sup>f</sup> Intake of staple foods was the sum of rice, bread, and noodle intake.

<sup>g</sup> Vegetables includes seaweeds and mushrooms.

<sup>h</sup> Soft drinks includes soda, sugar-sweetened juice, coffee with milk, and fermented lactic beverages.
